# Supplementary material
Source: PubMed Central journal article supplement (PMC4902584)
Supplement: supp_pp.15.01898_PP2015-01898R1_Supplemental_Material.pdf [file supp_pp.15.01898_PP2015-01898R1_Supplemental_Material.pdf]

# Supplemental Data

|              |                                                                                                   |     |
|--------------|---------------------------------------------------------------------------------------------------|-----|
| OsNaPRT1     | MAAAAAAANGAGCGVFRPTNFMVTFLLDLYQSMAYAYWKAGKLLRRAVFDFVFRSSFFCGETVFGGLEECRIANFKLDDITTFRISAMPT        | 99  |
| XP_002466135 | V...AAANGDACRSVCS.VFRPTNFMVTFLLDLYQSMAYAYWKAGKLLRRAVFDFVFRSSFFCGETVFGGLEECRIANFKLDDITTFRISAMPT    | 96  |
| XP_008668392 | V...AAANGDACRSVCS.VFRPTNFMVTFLLDLYQSMAYAYWKAGKLLRRAVFDFVFRSSFFCGETVFGGLEECRIANFKLDDITTFRISAMPT    | 96  |
| BAK05113     | MAAAALANGDVRAGCGGAVFRPTNFMVTFLLDLYQSMAYAYWKAGKLLRRAVFDFVFRSSFFCGETVFGGLEECRIANFKLDDITTFRISAMPT    | 100 |
| XP_009117282 | V...EKENG...NQRVVEICPTNFMVTFLLDLYQSMAYAYWKAGKLLRRAVFDFVFRSSFFCGETVFGGLEECRIANFKLDDITTFRISAMPT     | 95  |
| NP_195412    | V...EKENG...NQRVVEICPTNFMVTFLLDLYQSMAYAYWKAGKLLRRAVFDFVFRSSFFCGETVFGGLEECRIANFKLDDITTFRISAMPT     | 98  |
| OsNaPRT1     | CGDGFPEVSSDCSDVEVVALEGGSVVFPKVPKMIIEGPAVVOLLETPFLINNNASLVTNNAARHRVAGKRKRLLEFGARRAQQPDGASISAVCA    | 199 |
| XP_002466135 | CGDGFPEVSSDCSDVEVVALEGGSVVFPKVPKMIIEGPAVVOLLETPFLINNNASLVTNNAARHRVAGKRKRLLEFGARRAQQPDGASISAVCA    | 196 |
| XP_008668392 | CGDGFPEVSSDCSDVEVVALEGGSVVFPKVPKMIIEGPAVVOLLETPFLINNNASLVTNNAARHRVAGKRKRLLEFGARRAQQPDGASISAVCA    | 196 |
| BAK05113     | CGDGFPEVSSDCSDVEVVALEGGSVVFPKVPKMIIEGPAVVOLLETPFLINNNASLVTNNAARHRVAGKRKRLLEFGARRAQQPDGASISAVCA    | 200 |
| XP_009117282 | SEEA...LTKGDCSDVEVVALEGGSVVFPKVPKMIIEGPAVVOLLETPFLINNNASLVTNNAARHRVAGKRKRLLEFGARRAQQPDGASISAVCA   | 195 |
| NP_195412    | CGDGFPEVSSDCSDVEVVALEGGSVVFPKVPKMIIEGPAVVOLLETPFLINNNASLVTNNAARHRVAGKRKRLLEFGARRAQQPDGASISAVCA    | 198 |
| OsNaPRT1     | MGGFDATSNVAAGLFEGIFRGTHSHAFVSSRMGLDDELDRTIASSDGSNNKCDVSLVQNWYARIKDAGSLRRIPTNISELAATISYALAFNSFLA   | 299 |
| XP_002466135 | MGGFDATSNVAAGLFEGIFRGTHSHAFVSSRMGLDDELDRTIASSDGSNNKCDVSLVQNWYARIKDAGSLRRIPTNISELAATISYALAFNSFLA   | 296 |
| XP_008668392 | MGGFDATSNVAAGLFEGIFRGTHSHAFVSSRMGLDDELDRTIASSDGSNNKCDVSLVQNWYARIKDAGSLRRIPTNISELAATISYALAFNSFLA   | 296 |
| BAK05113     | MGGFDATSNVAAGLFEGIFRGTHSHAFVSSRMGLDDELDRTIASSDGSNNKCDVSLVQNWYARIKDAGSLRRIPTNISELAATISYALAFNSFLA   | 300 |
| XP_009117282 | LGGFDATSNVAAGLFEGIFRGTHSHAFVSSRMGLDDELDRTIASSDGSNNKCDVSLVQNWYARIKDAGSLRRIPTNISELAATISYALAFNSFLA   | 295 |
| NP_195412    | LGGFDATSNVAAGLFEGIFRGTHSHAFVSSRMGLDDELDRTIASSDGSNNKCDVSLVQNWYARIKDAGSLRRIPTNISELAATISYALAFNSFLA   | 298 |
| OsNaPRT1     | LVDTYDVMISGPNFCVAVALANLGYKAVGIRLDSGDLYLISVRRKRFPAARERLLKFFVVFQKRTSIFASNDLNEETDALNKQGHVEVFGICGLVTC | 399 |
| XP_002466135 | LVDTYDVMISGPNFCVAVALANLGYKAVGIRLDSGDLYLISVRRKRFPAARERLLKFFVVFQKRTSIFASNDLNEETDALNKQGHVEVFGICGLVTC | 396 |
| XP_008668392 | LVDTYDVMISGPNFCVAVALANLGYKAVGIRLDSGDLYLISVRRKRFPAARERLLKFFVVFQKRTSIFASNDLNEETDALNKQGHVEVFGICGLVTC | 396 |
| BAK05113     | LVDTYDVMISGPNFCVAVALANLGYKAVGIRLDSGDLYLISVRRKRFPAARERLLKFFVVFQKRTSIFASNDLNEETDALNKQGHVEVFGICGLVTC | 400 |
| XP_009117282 | LVDTYDVMISGPNFCVAVALANLGYKAVGIRLDSGDLYLISVRRKRFPAARERLLKFFVVFQKRTSIFASNDLNEETDALNKQGHVEVFGICGLVTC | 395 |
| NP_195412    | LVDTYDVMISGPNFCVAVALANLGYKAVGIRLDSGDLYLISVRRKRFPAARERLLKFFVVFQKRTSIFASNDLNEETDALNKQGHVEVFGICGLVTC | 398 |
| OsNaPRT1     | YAQAALGCVFKLVEINQPRIKLSEDDKVSIFCKRRCYRLMGREGYPLVDIMTGDDEPFKGERLGRHFPNESKRAVVPQVVEELLKCYWEGTTSSE   | 499 |
| XP_002466135 | YAQAALGCVFKLVEINQPRIKLSEDDKVSIFCKRRCYRLMGREGYPLVDIMTGDDEPFKGERLGRHFPNESKRAVVPQVVEELLKCYWEGTTSSE   | 496 |
| XP_008668392 | YAQAALGCVFKLVEINQPRIKLSEDDKVSIFCKRRCYRLMGREGYPLVDIMTGDDEPFKGERLGRHFPNESKRAVVPQVVEELLKCYWEGTTSSE   | 496 |
| BAK05113     | YAQAALGCVFKLVEINQPRIKLSEDDKVSIFCKRRCYRLMGREGYPLVDIMTGDDEPFKGERLGRHFPNESKRAVVPQVVEELLKCYWEGTTSSE   | 500 |
| XP_009117282 | YAQAALGCVFKLVEINQPRIKLSEDDKVSIFCKRRCYRLMGREGYPLVDIMTGDDEPFKGERLGRHFPNESKRAVVPQVVEELLKCYWEGTTSSE   | 495 |
| NP_195412    | YAQAALGCVFKLVEINQPRIKLSEDDKVSIFCKRRCYRLMGREGYPLVDIMTGDDEPFKGERLGRHFPNESKRAVVPQVVEELLKCYWEGTTSSE   | 498 |
| OsNaPRT1     | FRREDSINLDRSRMGYLDLRMRDHRRLINPTPKVSVSAKLYDFIHFPLWLNPAVGEGLQ.....                                  | 560 |
| XP_002466135 | FRREDSINLDRSRMGYLDLRMRDHRRLINPTPKVSVSAKLYDFIHFPLWLNPAVGEGLQ.....                                  | 557 |
| XP_008668392 | FRREDSINLDRSRMGYLDLRMRDHRRLINPTPKVSVSAKLYDFIHFPLWLNPAVGEGLQ.....                                  | 557 |
| BAK05113     | FRREDSINLDRSRMGYLDLRMRDHRRLINPTPKVSVSAKLYDFIHFPLWLNPAVGEGLQ.....                                  | 561 |
| XP_009117282 | ARESEPLKLRDRSRMGYLDLRMRDHRRLINPTPKVSVSAKLYDFIHFPLWLNPAVGEGLQ.....                                 | 556 |
| NP_195412    | ARESEPLKLRDRSRMGYLDLRMRDHRRLINPTPKVSVSAKLYDFIHFPLWLNPAVGEGLQ.....                                 | 559 |

**Supplemental Figure 1.** Protein Sequence Alignment of OsNaPRT1 and Homologs.

Protein sequence alignment of OsNaPRT1 and homologs in sorghum, maize, barley, turnip, and *Arabidopsis thaliana* using Clustal W. Conserved amino acids are highlighted: white letters on a black background indicate amino acids conserved across all these samples (100% conservation). Arrowhead shows the mutant amino acid in *Its1*.

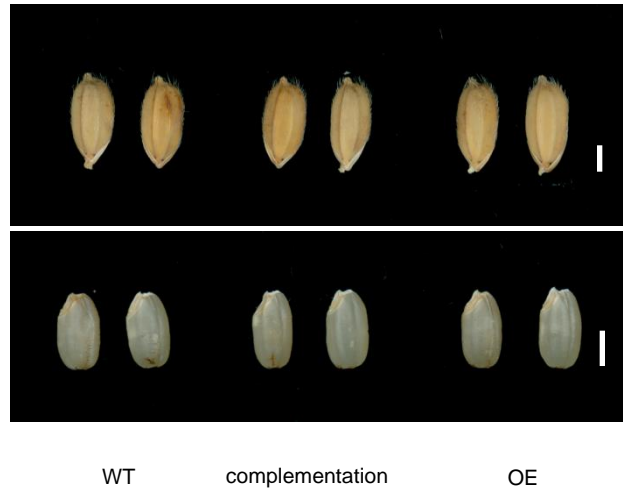

**Supplemental Figure 2.** The Phenotypes of Wild Type, Complementation and Overexpression Grains (top) and Brown Rice (bottom).  
Bars=2 mm.

**Supplemental Table 1.** Functional Classification of Differentially Expressed Genes (DEGs) in *Its1* Mutant Compared to Wild Type Plants.

| Gene Ontology Nos. | Gene Ontology Annotation                         | Down | Up  |
|--------------------|--------------------------------------------------|------|-----|
| GO:0055114         | oxidation reduction                              | 36   | 75  |
| GO:0006468         | protein amino acid phosphorylation               | 21   | 73  |
| GO:0045449         | regulation of transcription                      | 31   | 99  |
| GO:0006508         | proteolysis                                      | 10   | 22  |
| GO:0016052         | carbohydrate catabolic process                   | 6    | 14  |
| GO:0005976         | polysaccharide metabolic process                 | 2    | 15  |
| GO:0009057         | macromolecule catabolic process                  | 5    | 13  |
| GO:0019748         | secondary metabolic process                      | 2    | 14  |
| GO:0006575         | cellular amino acid derivative metabolic process | 4    | 12  |
| GO:0005996         | monosaccharide metabolic process                 | 5    | 9   |
| GO:0009072         | aromatic amino acid family metabolic process     | 2    | 10  |
| GO:0006091         | generation of precursor metabolites and energy   | 6    | 7   |
| GO:0009698         | phenylpropanoid metabolic process                | 0    | 11  |
| GO:0046394         | carboxylic acid biosynthetic process             | 4    | 13  |
| GO:0051186         | cofactor metabolic process                       | 6    | 5   |
| GO:0044271         | nitrogen compound biosynthetic process           | 5    | 13  |
| GO:0006811         | ion transport                                    | 24   | 17  |
| GO:0055085         | transmembrane transport                          | 5    | 6   |
| GO:0007242         | intracellular signaling cascade                  | 3    | 10  |
| GO:0006979         | response to oxidative stress                     | 2    | 11  |
| GO:0010033         | response to organic substance                    | 4    | 8   |
| GO:0009719         | response to endogenous stimulus                  | 3    | 8   |
| GO:0006952         | defense response                                 | 4    | 15  |
| GO:0012501         | cell death                                       | 1    | 8   |
| Unknown            | Unknown function                                 | 65   | 137 |
| Total              |                                                  | 256  | 625 |

**Supplemental Table 2.** Senescence-related Genes Identified by Affymetrix Microarray Analysis as Being Differentially Expressed in *Its1* Mutant Plants.

| <b>Locus</b>          | <b>Annotation</b>                                       | <b>Fold change</b> |
|-----------------------|---------------------------------------------------------|--------------------|
| <b>Up-regulated</b>   |                                                         | Log2 ratio         |
| LOC_Os09g35630        | BAG domain-containing protein                           | 2.15               |
| LOC_Os12g36720        | RGH1A                                                   | 1.48               |
| LOC_Os08g29854        | RGH1A                                                   | 1.17               |
| LOC_Os06g41480        | vrga1                                                   | 1.17               |
| LOC_Os02g35490        | MLO domain containing protein                           | 1.15               |
| LOC_Os11g45930        | NBS-LRR type disease resistance protein                 | 1.10               |
| LOC_Os11g13430        | RGH1A                                                   | 1.04               |
| LOC_Os11g12330        | disease resistance protein RPM1                         | 1.01               |
| <b>Down-regulated</b> |                                                         |                    |
| LOC_Os11g31060        | IQ calmodulin-binding and BAG domain containing protein | -1.27              |

**Supplemental Table 3.** PCR Primers Used in This Study.

| <b>Primer Name</b> | <b>Primer Sequence</b>                                                                | <b>Description</b>                                               |
|--------------------|---------------------------------------------------------------------------------------|------------------------------------------------------------------|
| P1                 | AAGGAAAGAGTTGTCCGTAAT<br>CCTGTAAGAAGATAGGGTCAAGAG                                     | Fine mapping<br>Fine mapping                                     |
| P2                 | TGGTGGTAGTATTAGCCTTTGT<br>TTCTTTCAGGAGACTTGGGAAC                                      | Fine mapping<br>Fine mapping                                     |
| P3                 | GGGTCCTAGTCCTTTCTTTCCG<br>AACTTTGCCTTTGCTTTGCCTC                                      | Fine mapping<br>Fine mapping                                     |
| P4                 | TGCCAGCCTAGCGAGCCTAA<br>ATTGCAGCGAGCTACACG                                            | Fine mapping<br>Fine mapping                                     |
| P5                 | ATGGCTTCAGACTTCAGAGT<br>CAAATTAACCTTCAGGCAAG                                          | Fine mapping<br>Fine mapping                                     |
| ID-Na              | TCCACTGTCCCTAAATCACC<br>TCCTTCTGCCTCGTCCAT                                            | Identification for osnaprt1<br>Identification for osnaprt1       |
| ComNa1             | CTGCAGGCAGGACATGCAGATGGAATGATGTCAGTG<br>GAGCTCACTTGATACCTGGCTGCCTCTAACACTAGG          | Complementary<br>construction<br>Complementary<br>construction   |
| ComNa2             | GAGCTCTATGGGAGGATTTGATGCAACAAGGTCTGG<br>GAGCTCCGCGCGGAGAGCTCCGGCGATGTCCTTGACGAGGAAGCG | Complementary<br>construction<br>Complementary<br>construction   |
| OE                 | GGATCCATGGCGGCGGCGGCGGCAGCGG<br>CTGCAGTCATTGCAGTTCGCCTACCGGA                          | Overexpression<br>construction<br>Overexpression<br>construction |
| AntiNa             | GGATCCATGGCGGCGGCGGCGGCAGCGG<br>CTCGAGTTGCAGTTCGCCTACCGGAGCT                          | Antibody of OsNaPRT1<br>Antibody of OsNaPRT1                     |
| qACTIN             | GACCCAGATCATGTTTGAGACCT<br>CAGTGTGGCTGACACCATCAC                                      | qRT-PCR Analysis<br>qRT-PCR Analysis                             |
| qNaPRT1            | GCATACTTATCCGTTGAAACTCG<br>GCATCTACCTCGTGACCCTG                                       | qRT-PCR Analysis<br>qRT-PCR Analysis                             |
| EGFP               | CGGGATCCATGGCGGCGGCGGCGGCA<br>GCTCTAGATTGCAGTTCGCCTACCGGAGCTTCG                       | Sub-cellular localization<br>Sub-cellular localization           |
| qNIC               | GCCAGTCTTTGCGTTTCTTG<br>CCTTTTCCAGCCACTCCAG                                           | qRT-PCR Analysis<br>qRT-PCR Analysis                             |
| qSRT1              | GAAGTTCTGGGAGCAAGATTTT<br>TGAACCAACCACTAGAAGAGCA                                      | qRT-PCR Analysis<br>qRT-PCR Analysis                             |
| qSRT2              | ACTTTAGTGATGGTTGCGGCT<br>CACGTGATCGATGCTCTGC                                          | qRT-PCR Analysis<br>qRT-PCR Analysis                             |
| qOsh36             | GCACGGAGGCGAACGA<br>TTGAGCGGTAGCACCCATT                                               | qRT-PCR Analysis<br>qRT-PCR Analysis                             |
| qOsl57             | ACCCTAAAGTAAATGAAGTC<br>CCTGCTCTTGCTTTGTTA                                            | qRT-PCR Analysis<br>qRT-PCR Analysis                             |
| qOsh69             | CCACAACACGGATAACTT<br>GGTGAACACTATGGAACA                                              | qRT-PCR Analysis<br>qRT-PCR Analysis                             |
| Ch-LOC_Os09g35630  | GCCACTCCCTTCCCCAAT<br>CGCAGCTAAAGCTCGCAA                                              | ChIP-PCR Assay<br>ChIP-PCR Assay                                 |
| Ch-LOC_Os12g36720  | GCAGCTTAATTATTCAGATGTCGT<br>TGAGCCTCTTGAGTTTATCAGTATG                                 | ChIP-PCR Assay<br>ChIP-PCR Assay                                 |
| Ch-LOC_Os08g29854  | ATTCGTCTTCCCCTCGG<br>GAAATGGGGAATTGGGGAT                                              | ChIP-PCR Assay<br>ChIP-PCR Assay                                 |
| Ch-LOC_Os02g35490  | TTCTCTCCCCGCACCTCTAC<br>GAGAATGTCAAACCTCAAACCTGGG                                     | ChIP-PCR Assay<br>ChIP-PCR Assay                                 |
| Ch-LOC_Os11g45930  | CACTTACTTGTCTGATTTTGCACCTC<br>ATCCTCCAAGTCGTCTGCTAAG                                  | ChIP-PCR Assay<br>ChIP-PCR Assay                                 |
